# Supplementary material for: Debunking competition - Global Ecologically Unequal Exchange explained by exploitation and control relations
Source: Research Square preprint supplement (doi:10.21203/rs.3.rs-3951298/v1), 2024-03-08
Supplement: Supplementary file 1 [file c358ddede6515e7d602fbf0b.pdf]

**Supplementary Material for the Manuscript “*Debunking competition - Global Ecologically Unequal Exchange explained by exploitation and control relations*”**

**Environmental variables and abbreviations.**

| <b>Category</b> | <b>Stressor &amp; Unit</b>                                                                                                                                         |
|-----------------|--------------------------------------------------------------------------------------------------------------------------------------------------------------------|
| <b>LUC</b>      | Cropland - Cereal grains nec, km2                                                                                                                                  |
|                 | Cropland - Crops nec, km2                                                                                                                                          |
|                 | Cropland - Fodder crops-Cattle, km2                                                                                                                                |
|                 | Cropland - Fodder crops-Meat animals nec, km2                                                                                                                      |
|                 | Cropland - Fodder crops-Pigs, km2                                                                                                                                  |
|                 | Cropland - Fodder crops-Poultry, km2                                                                                                                               |
|                 | Cropland - Fodder crops-Raw milk, km2                                                                                                                              |
|                 | Cropland - Oil seeds, km2                                                                                                                                          |
|                 | Cropland - Paddy rice, km2                                                                                                                                         |
|                 | Cropland - Plant-based fibers, km2                                                                                                                                 |
|                 | Cropland - Sugar cane, sugar beet, km2                                                                                                                             |
|                 | Cropland - Vegetables, fruit, nuts, km2                                                                                                                            |
|                 | Cropland - Wheat, km2                                                                                                                                              |
|                 | Forest area - Forestry, km2                                                                                                                                        |
|                 | Other land Use: Total, km2                                                                                                                                         |
|                 | Permanent pastures - Grazing-Cattle, km2                                                                                                                           |
|                 | Permanent pastures - Grazing-Meat animals nec, km2                                                                                                                 |
|                 | Permanent pastures - Grazing-Raw milk, km2                                                                                                                         |
|                 | Infrastructure land, km2                                                                                                                                           |
|                 | Forest area - Marginal use, km2                                                                                                                                    |
| <b>WCB</b>      | Water Consumption Blue - Total, Mm3                                                                                                                                |
| <b>GHG</b>      | GHG emissions (GWP100)   Problem oriented approach: baseline (CML, 1999)   GWP100 (IPCC, 2007), O2 eq.                                                             |
| <b>FAE</b>      | Freshwater aquatic ecotoxicity (FAETP inf)   Problem oriented approach: baseline (CML, 1999)   FAETP inf. (Huijbregts, 1999 & 2000), "kg 1,4-dichlorobenzene eq. " |
| <b>MAE</b>      | Marine aquatic ecotoxicity (MAETP inf)   Problem oriented approach: baseline (CML, 1999)   MAETP inf. (Huijbregts, 1999 & 2000), "kg 1,4-dichlorobenzene eq. "     |
| <b>TEX</b>      | Terrestrial ecotoxicity (TETP inf)   Problem oriented approach: baseline (CML, 1999)   TETP inf.(Huijbregts, 1999 & 2000), "kg 1,4-dichlorobenzene eq. "           |

|            |                                                                                                                                                                                                              |
|------------|--------------------------------------------------------------------------------------------------------------------------------------------------------------------------------------------------------------|
| <b>PHO</b> | photochemical oxidation (MIR; very high NOx)   Problem oriented approach: non baseline (CML, 1999)   MIR 1997; very high NOx (Carter, 1994, 1997, 1998;Carter, Pierce, Luo & Malkina, 1995 ),kg formed ozone |
| <b>PMR</b> | Particulate matter/Respiratory inorganics midpoint   ILCD recommended CF   emission-weighted average PM2.5 equivalent, kg PM2.5-eq                                                                           |
| <b>DEU</b> | Domestic Extraction Used - Crop and Crop Residue,kt                                                                                                                                                          |
|            | Domestic Extraction Used - Grazing and Fodder,kt                                                                                                                                                             |
|            | Domestic Extraction Used - Forestry and Timber,kt                                                                                                                                                            |
|            | Domestic Extraction Used - Fisheries, kt                                                                                                                                                                     |
|            | Domestic Extraction Used - Non-metalic Minerals,kt                                                                                                                                                           |
|            | Domestic Extraction Used - Iron Ore,kt                                                                                                                                                                       |
|            | Domestic Extraction Used - Non-ferous metal ores,kt                                                                                                                                                          |

**Table 1. Environmental variables from EXIOBASE with abbreviations used in the text and units.**

## Global map with embedded environmental pressures

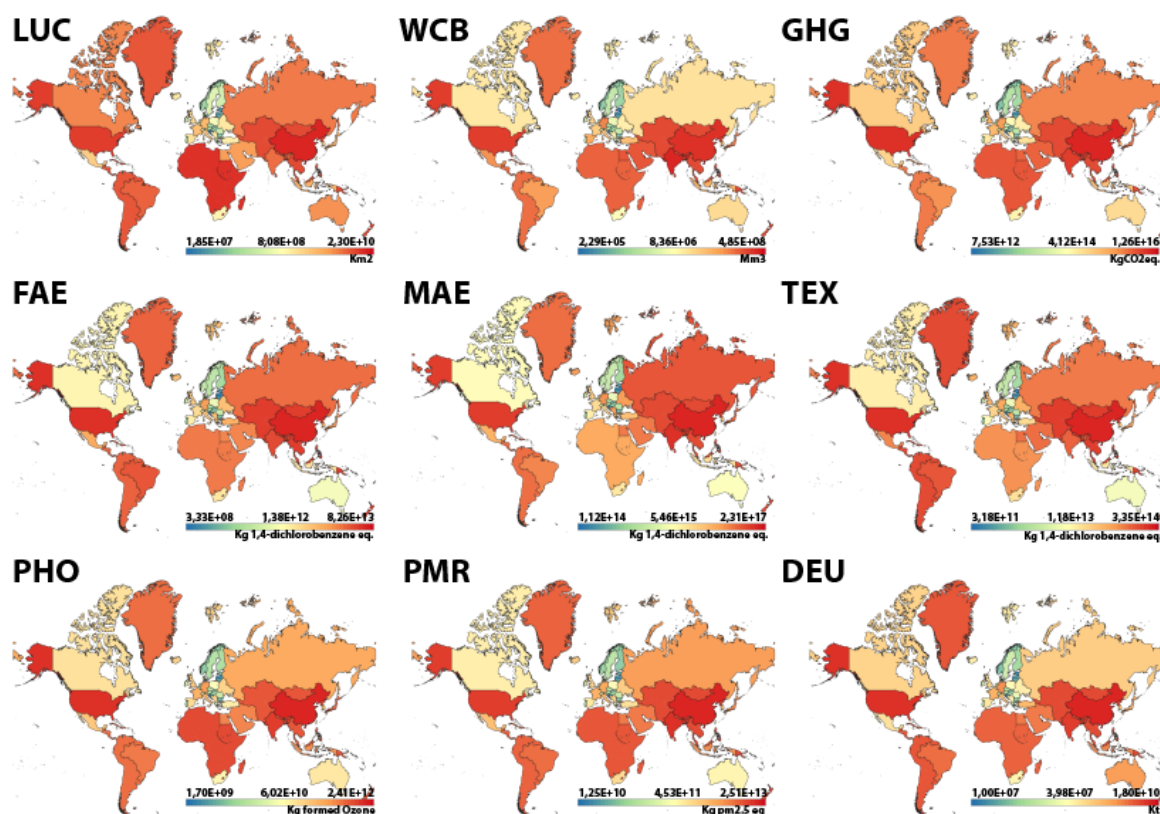

**Fig.1. Global ecological pressures embedded in economic production.** All values assess the amount of natural resources required, or the environmental impact produced, directly and indirectly, to generate the economic output. DEU = Domestic Extraction Used; GHG = Greenhouse gasses emissions; MAE = Marine Aquatic Ecotoxicity; PMR = Particulate Matter/Respiratory; WCB = Water Consumption Blue; FAE = Freshwater Aquatic Ecotoxicity; LUC = Land Use Change; PHO = Photochemical Oxidation; TEX = Terrestrial Ecotoxicity

## Environmental pressures' intensity and environmental pressures' intensity per capita.

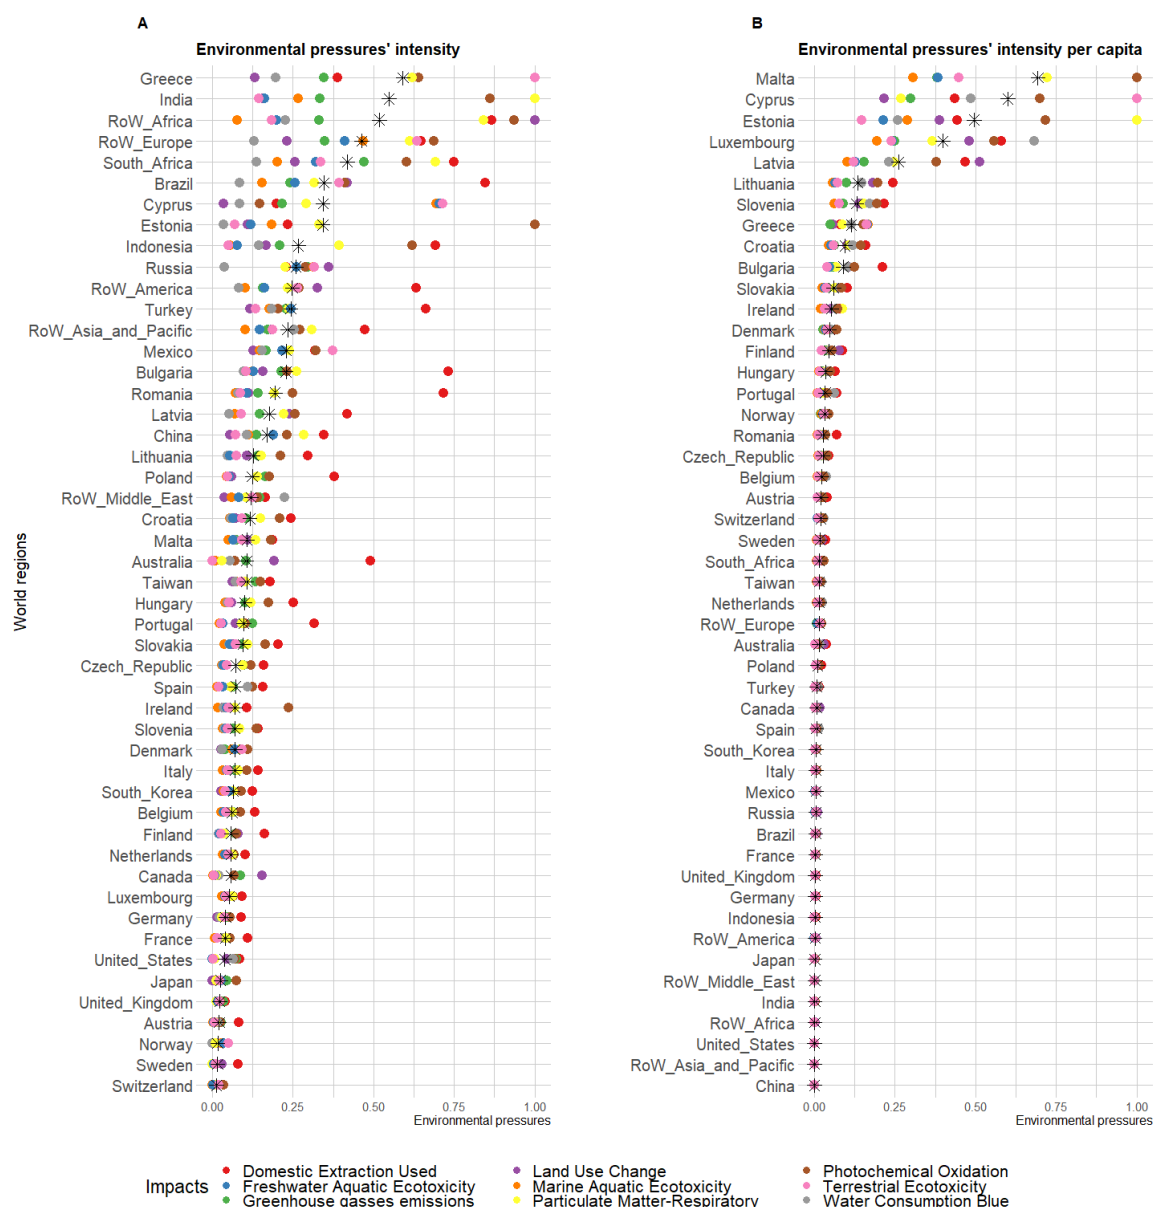

**Fig. 2. Global distribution of environmental pressures' intensity and environmental pressures' intensity per capita in 2022.** (a) Environmental pressures' intensity and (b) environmental pressures' intensity per capita of each world region. Each dot represents an environmental pressure, the star represents the average pressure for all indicators of each world region. The values presented are homogenized using min-max normalization to facilitate the visual comparison of indicators. Fig. 1 (main text) presents the raw values.

## Embedded environmental pressures

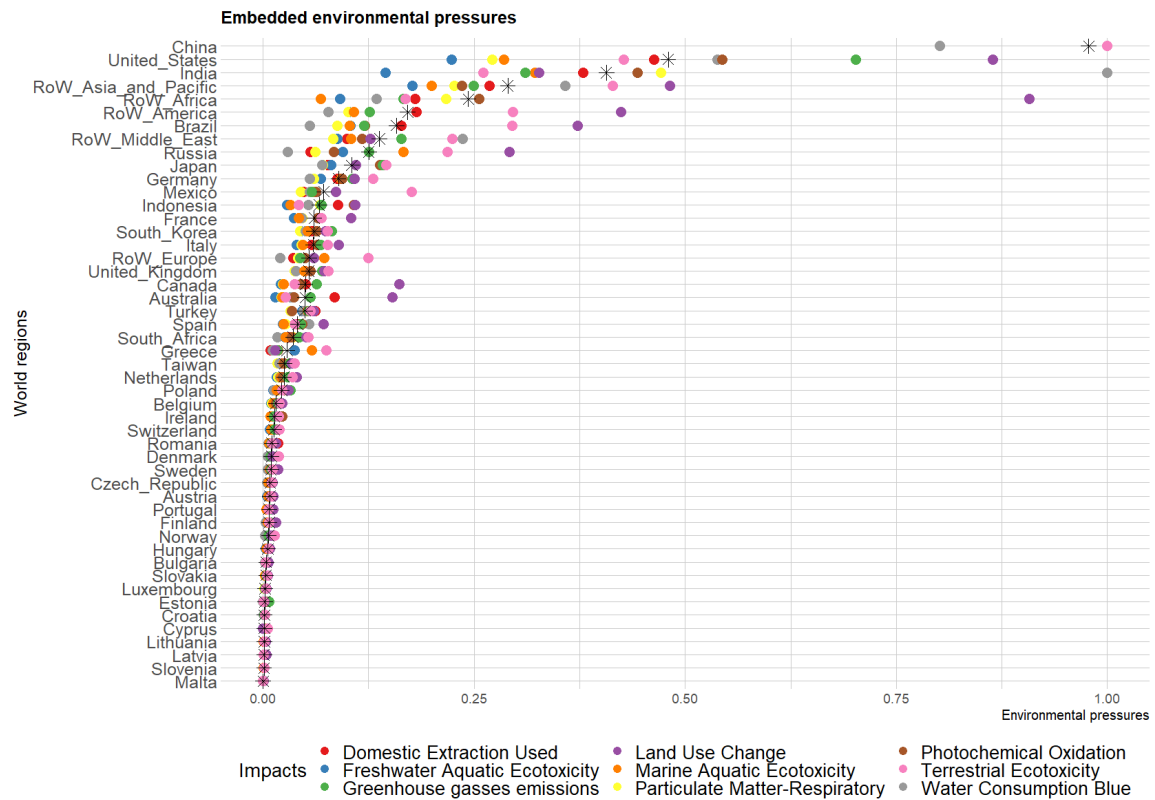

**Fig. 3. Global distribution of embedded environmental pressures in 2022.** Each dot represents an environmental pressure, the star represents the average pressure for all indicators of each world region. The values presented are homogenized using min-max normalization to facilitate the visual comparison of indicators. Supplementary Material Fig. 1 presents the raw values.

## Average pull and driving force weights per world region

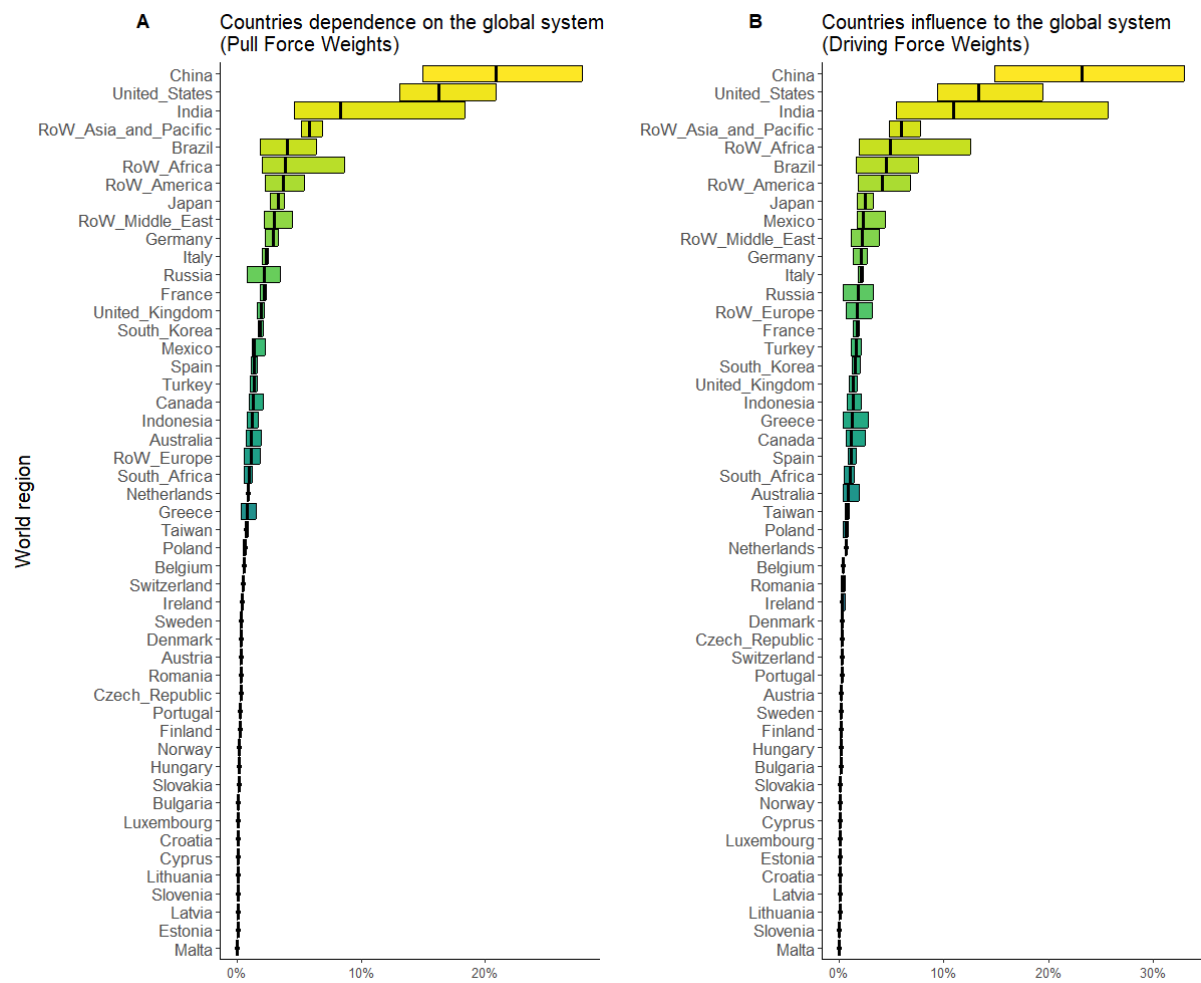

**Fig. 4. Average pull and driving force weights per world region in 2022.** In Fig.4A and 4B, the box represents the minimum and maximum and the black line the average of PFW and DFW for all indicators. Full data of the PFW and DFW of each indicator for each world region is available in Supplementary Material Tables 4 and 5.

**Correlation analysis of PFW and DFW for all indicators between them, with economic output and economic output per capita.**

| Parameter1 | Parameter2      | r     | 95% CI        | t(47) | p         |
|------------|-----------------|-------|---------------|-------|-----------|
| DEU        | GHG             | 0.98  | [ 0.97, 0.99] | 35.48 | < .001*** |
| DEU        | FAE             | 0.96  | [ 0.93, 0.98] | 23.35 | < .001*** |
| DEU        | TEX             | 0.98  | [ 0.96, 0.99] | 32.55 | < .001*** |
| DEU        | WCB             | 0.92  | [ 0.86, 0.95] | 15.67 | < .001*** |
| DEU        | PMR             | 0.97  | [ 0.95, 0.99] | 29.68 | < .001*** |
| DEU        | PHO             | 0.99  | [ 0.99, 1.00] | 61.38 | < .001*** |
| DEU        | MAE             | 0.98  | [ 0.96, 0.99] | 31.17 | < .001*** |
| DEU        | LUC             | 0.94  | [ 0.90, 0.97] | 19.37 | < .001*** |
| DEU        | Economic_Output | 0.96  | [ 0.94, 0.98] | 24.65 | < .001*** |
| DEU        | EO_capita       | -0.11 | [-0.38, 0.18] | -0.75 | > .999    |
| GHG        | FAE             | 0.92  | [ 0.87, 0.96] | 16.46 | < .001*** |
| GHG        | TEX             | 0.96  | [ 0.93, 0.98] | 24.41 | < .001*** |
| GHG        | WCB             | 0.90  | [ 0.83, 0.94] | 14.07 | < .001*** |
| GHG        | PMR             | 0.93  | [ 0.88, 0.96] | 17.32 | < .001*** |
| GHG        | PHO             | 0.99  | [ 0.98, 0.99] | 44.52 | < .001*** |
| GHG        | MAE             | 0.95  | [ 0.91, 0.97] | 20.09 | < .001*** |
| GHG        | LUC             | 0.95  | [ 0.91, 0.97] | 21.08 | < .001*** |
| GHG        | Economic_Output | 0.99  | [ 0.98, 0.99] | 44.67 | < .001*** |
| GHG        | EO_capita       | -0.06 | [-0.33, 0.23] | -0.40 | > .999    |
| FAE        | TEX             | 0.96  | [ 0.92, 0.98] | 22.63 | < .001*** |
| FAE        | WCB             | 0.82  | [ 0.70, 0.89] | 9.79  | < .001*** |
| FAE        | PMR             | 0.97  | [ 0.94, 0.98] | 25.64 | < .001*** |
| FAE        | PHO             | 0.94  | [ 0.90, 0.97] | 19.43 | < .001*** |
| FAE        | MAE             | 0.99  | [ 0.98, 0.99] | 44.50 | < .001*** |
| FAE        | LUC             | 0.86  | [ 0.76, 0.92] | 11.54 | < .001*** |
| FAE        | Economic_Output | 0.93  | [ 0.88, 0.96] | 17.38 | < .001*** |
| FAE        | EO_capita       | -0.12 | [-0.39, 0.16] | -0.85 | > .999    |
| TEX        | WCB             | 0.86  | [ 0.76, 0.92] | 11.54 | < .001*** |
| TEX        | PMR             | 0.94  | [ 0.90, 0.97] | 19.32 | < .001*** |
| TEX        | PHO             | 0.97  | [ 0.94, 0.98] | 25.95 | < .001*** |
| TEX        | MAE             | 0.97  | [ 0.94, 0.98] | 26.30 | < .001*** |
| TEX        | LUC             | 0.94  | [ 0.89, 0.97] | 18.82 | < .001*** |
| TEX        | Economic_Output | 0.95  | [ 0.91, 0.97] | 20.10 | < .001*** |
| TEX        | EO_capita       | -0.15 | [-0.41, 0.14] | -1.01 | > .999    |
| WCB        | PMR             | 0.92  | [ 0.87, 0.96] | 16.64 | < .001*** |
| WCB        | PHO             | 0.93  | [ 0.88, 0.96] | 17.68 | < .001*** |

|                                        |                 |           |               |       |           |
|----------------------------------------|-----------------|-----------|---------------|-------|-----------|
| WCB                                    | MAE             | 0.89      | [ 0.81, 0.93] | 13.17 | < .001*** |
| WCB                                    | LUC             | 0.83      | [ 0.72, 0.90] | 10.38 | < .001*** |
| WCB                                    | Economic_Output | 0.85      | [ 0.75, 0.91] | 11.04 | < .001*** |
| WCB                                    | EO_capita       | -0.12     | [-0.39, 0.16] | -0.85 | > .999    |
| PMR                                    | PHO             | 0.97      | [ 0.95, 0.98] | 27.75 | < .001*** |
| PMR                                    | MAE             | 0.98      | [ 0.97, 0.99] | 37.55 | < .001*** |
| PMR                                    | LUC             | 0.88      | [ 0.79, 0.93] | 12.64 | < .001*** |
| PMR                                    | Economic_Output | 0.91      | [ 0.84, 0.95] | 15.00 | < .001*** |
| PMR                                    | EO_capita       | -0.15     | [-0.41, 0.14] | -1.05 | > .999    |
| PHO                                    | MAE             | 0.97      | [ 0.94, 0.98] | 26.64 | < .001*** |
| PHO                                    | LUC             | 0.95      | [ 0.91, 0.97] | 20.24 | < .001*** |
| PHO                                    | Economic_Output | 0.97      | [ 0.95, 0.98] | 26.82 | < .001*** |
| PHO                                    | EO_capita       | -0.10     | [-0.37, 0.19] | -0.68 | > .999    |
| MAE                                    | LUC             | 0.88      | [ 0.79, 0.93] | 12.45 | < .001*** |
| MAE                                    | Economic_Output | 0.94      | [ 0.90, 0.97] | 18.98 | < .001*** |
| MAE                                    | EO_capita       | -0.13     | [-0.40, 0.16] | -0.90 | > .999    |
| LUC                                    | Economic_Output | 0.92      | [ 0.86, 0.95] | 15.85 | < .001*** |
| LUC                                    | EO_capita       | -0.11     | [-0.38, 0.17] | -0.77 | > .999    |
| Economic_Output                        | EO_capita       | -6.48e-03 | [-0.29, 0.28] | -0.04 | > .999    |
| p-value adjustment method: Holm (1979) |                 |           |               |       |           |
| Observations: 49                       |                 |           |               |       |           |

**Table 2. Correlation of PFW for all indicators between them, with economic output and economic output per capita.**

| Parameter1 | Parameter2      | r     | 95% CI        | t(47) | p         |
|------------|-----------------|-------|---------------|-------|-----------|
| DEU        | GHG             | 0.97  | [ 0.94, 0.98] | 26.78 | < .001*** |
| DEU        | FAE             | 0.94  | [ 0.90, 0.97] | 18.86 | < .001*** |
| DEU        | TEX             | 0.95  | [ 0.91, 0.97] | 20.28 | < .001*** |
| DEU        | WCB             | 0.86  | [ 0.76, 0.92] | 11.44 | < .001*** |
| DEU        | PMR             | 0.97  | [ 0.94, 0.98] | 25.97 | < .001*** |
| DEU        | PHO             | 0.99  | [ 0.98, 0.99] | 44.78 | < .001*** |
| DEU        | MAE             | 0.96  | [ 0.94, 0.98] | 24.60 | < .001*** |
| DEU        | LUC             | 0.88  | [ 0.79, 0.93] | 12.66 | < .001*** |
| DEU        | Economic_Output | 0.91  | [ 0.85, 0.95] | 15.10 | < .001*** |
| DEU        | EO_capita       | -0.16 | [-0.42, 0.13] | -1.12 | > .999    |
| GHG        | FAE             | 0.89  | [ 0.81, 0.94] | 13.36 | < .001*** |
| GHG        | TEX             | 0.91  | [ 0.84, 0.95] | 14.87 | < .001*** |
| GHG        | WCB             | 0.83  | [ 0.71, 0.90] | 10.09 | < .001*** |
| GHG        | PMR             | 0.90  | [ 0.83, 0.94] | 14.19 | < .001*** |
| GHG        | PHO             | 0.98  | [ 0.96, 0.99] | 32.73 | < .001*** |
| GHG        | MAE             | 0.92  | [ 0.86, 0.95] | 15.74 | < .001*** |



|                 |                 |           |               |       |           |
|-----------------|-----------------|-----------|---------------|-------|-----------|
| GHG             | LUC             | 0.88      | [ 0.80, 0.93] | 12.74 | < .001*** |
| GHG             | Economic_Output | 0.98      | [ 0.96, 0.99] | 30.62 | < .001*** |
| GHG             | EO_capita       | -0.10     | [-0.37, 0.19] | -0.67 | > .999    |
| FAE             | TEX             | 0.93      | [ 0.88, 0.96] | 17.75 | < .001*** |
| FAE             | WCB             | 0.70      | [ 0.52, 0.82] | 6.76  | < .001*** |
| FAE             | PMR             | 0.94      | [ 0.90, 0.97] | 19.11 | < .001*** |
| FAE             | PHO             | 0.91      | [ 0.85, 0.95] | 15.32 | < .001*** |
| FAE             | MAE             | 0.98      | [ 0.97, 0.99] | 34.48 | < .001*** |
| FAE             | LUC             | 0.76      | [ 0.61, 0.86] | 08.02 | < .001*** |
| FAE             | Economic_Output | 0.85      | [ 0.75, 0.91] | 11.15 | < .001*** |
| FAE             | EO_capita       | -0.16     | [-0.42, 0.12] | -1.13 | > .999    |
| TEX             | WCB             | 0.75      | [ 0.59, 0.85] | 7.73  | < .001*** |
| TEX             | PMR             | 0.90      | [ 0.84, 0.95] | 14.58 | < .001*** |
| TEX             | PHO             | 0.92      | [ 0.86, 0.95] | 16.14 | < .001*** |
| TEX             | MAE             | 0.94      | [ 0.90, 0.97] | 19.04 | < .001*** |
| TEX             | LUC             | 0.86      | [ 0.76, 0.92] | 11.56 | < .001*** |
| TEX             | Economic_Output | 0.85      | [ 0.75, 0.92] | 11.24 | < .001*** |
| TEX             | EO_capita       | -0.24     | [-0.48, 0.05] | -1.66 | > .999    |
| WCB             | PMR             | 0.88      | [ 0.80, 0.93] | 12.68 | < .001*** |
| WCB             | PHO             | 0.88      | [ 0.80, 0.93] | 12.99 | < .001*** |
| WCB             | MAE             | 0.81      | [ 0.69, 0.89] | 9.51  | < .001*** |
| WCB             | LUC             | 0.70      | [ 0.53, 0.82] | 6.79  | < .001*** |
| WCB             | Economic_Output | 0.73      | [ 0.56, 0.84] | 7.22  | < .001*** |
| WCB             | EO_capita       | -0.16     | [-0.43, 0.12] | -1.14 | > .999    |
| PMR             | PHO             | 0.96      | [ 0.94, 0.98] | 24.55 | < .001*** |
| PMR             | MAE             | 0.97      | [ 0.95, 0.98] | 28.83 | < .001*** |
| PMR             | LUC             | 0.80      | [ 0.67, 0.88] | 9.19  | < .001*** |
| PMR             | Economic_Output | 0.82      | [ 0.70, 0.89] | 9.71  | < .001*** |
| PMR             | EO_capita       | -0.20     | [-0.45, 0.09] | -1.38 | > .999    |
| PHO             | MAE             | 0.95      | [ 0.91, 0.97] | 20.66 | < .001*** |
| PHO             | LUC             | 0.89      | [ 0.80, 0.93] | 13.04 | < .001*** |
| PHO             | Economic_Output | 0.92      | [ 0.87, 0.96] | 16.42 | < .001*** |
| PHO             | EO_capita       | -0.15     | [-0.41, 0.14] | -1.01 | > .999    |
| MAE             | LUC             | 0.77      | [ 0.62, 0.86] | 8.23  | < .001*** |
| MAE             | Economic_Output | 0.86      | [ 0.77, 0.92] | 11.61 | < .001*** |
| MAE             | EO_capita       | -0.18     | [-0.44, 0.11] | -1.25 | > .999    |
| LUC             | Economic_Output | 0.83      | [ 0.71, 0.90] | 10.02 | < .001*** |
| LUC             | EO_capita       | -0.19     | [-0.44, 0.10] | -1.29 | > .999    |
| Economic_Output | EO_capita       | -6.48e-03 | [-0.29, 0.28] | -0.04 | > .999    |

|                                        |
|----------------------------------------|
| p-value adjustment method: Holm (1979) |
| Observations: 49                       |

**Table 3. Correlation of DFW for all indicators between them, with economic output and economic output per capita.**

**Tables of PFW and DFW for each indicator of each world region.**

| <b>Countries</b> | <b>Economic Output</b> | <b>LUC</b> | <b>WCB</b> | <b>GHG</b> | <b>FAE</b> | <b>MAE</b> | <b>TEX</b> | <b>PHO</b> | <b>PMR</b> | <b>DEU</b> |
|------------------|------------------------|------------|------------|------------|------------|------------|------------|------------|------------|------------|
| <b>AT</b>        | 0,477%                 | 0,296%     | 0,246%     | 0,325%     | 0,290%     | 0,303%     | 0,319%     | 0,313%     | 0,284%     | 0,325%     |
| <b>BE</b>        | 0,593%                 | 0,528%     | 0,498%     | 0,539%     | 0,511%     | 0,532%     | 0,575%     | 0,524%     | 0,500%     | 0,518%     |
| <b>BG</b>        | 0,078%                 | 0,115%     | 0,091%     | 0,113%     | 0,118%     | 0,135%     | 0,124%     | 0,104%     | 0,111%     | 0,135%     |
| <b>CY</b>        | 0,022%                 | 0,016%     | 0,026%     | 0,034%     | 0,104%     | 0,127%     | 0,114%     | 0,023%     | 0,034%     | 0,022%     |
| <b>CZ</b>        | 0,327%                 | 0,276%     | 0,230%     | 0,304%     | 0,280%     | 0,298%     | 0,307%     | 0,289%     | 0,279%     | 0,281%     |
| <b>DE</b>        | 4,016%                 | 2,644%     | 2,252%     | 3,043%     | 3,036%     | 3,275%     | 3,277%     | 2,917%     | 2,629%     | 2,881%     |
| <b>DK</b>        | 0,366%                 | 0,282%     | 0,242%     | 0,286%     | 0,332%     | 0,359%     | 0,392%     | 0,311%     | 0,294%     | 0,283%     |
| <b>EE</b>        | 0,036%                 | 0,036%     | 0,024%     | 0,091%     | 0,035%     | 0,048%     | 0,034%     | 0,066%     | 0,040%     | 0,031%     |
| <b>ES</b>        | 1,467%                 | 1,536%     | 1,619%     | 1,397%     | 1,259%     | 1,166%     | 1,226%     | 1,500%     | 1,271%     | 1,418%     |
| <b>FI</b>        | 0,293%                 | 0,272%     | 0,148%     | 0,262%     | 0,215%     | 0,253%     | 0,241%     | 0,231%     | 0,198%     | 0,233%     |
| <b>FR</b>        | 2,810%                 | 2,384%     | 1,892%     | 2,221%     | 2,055%     | 2,054%     | 2,208%     | 2,252%     | 2,134%     | 2,255%     |
| <b>GR</b>        | 0,196%                 | 0,355%     | 0,413%     | 0,479%     | 1,271%     | 1,576%     | 1,371%     | 0,520%     | 0,570%     | 0,355%     |
| <b>HR</b>        | 0,061%                 | 0,058%     | 0,050%     | 0,061%     | 0,059%     | 0,064%     | 0,072%     | 0,066%     | 0,061%     | 0,061%     |
| <b>HU</b>        | 0,193%                 | 0,173%     | 0,149%     | 0,184%     | 0,178%     | 0,193%     | 0,197%     | 0,185%     | 0,174%     | 0,182%     |
| <b>IE</b>        | 0,522%                 | 0,367%     | 0,333%     | 0,392%     | 0,379%     | 0,367%     | 0,414%     | 0,458%     | 0,358%     | 0,370%     |
| <b>IT</b>        | 2,168%                 | 2,410%     | 2,057%     | 2,353%     | 2,322%     | 2,418%     | 2,544%     | 2,361%     | 2,253%     | 2,238%     |
| <b>LT</b>        | 0,052%                 | 0,058%     | 0,039%     | 0,058%     | 0,050%     | 0,055%     | 0,060%     | 0,057%     | 0,053%     | 0,055%     |
| <b>LU</b>        | 0,117%                 | 0,110%     | 0,101%     | 0,102%     | 0,102%     | 0,106%     | 0,115%     | 0,100%     | 0,100%     | 0,098%     |
| <b>LV</b>        | 0,037%                 | 0,064%     | 0,033%     | 0,045%     | 0,042%     | 0,043%     | 0,047%     | 0,048%     | 0,047%     | 0,048%     |
| <b>MT</b>        | 0,018%                 | 0,031%     | 0,020%     | 0,019%     | 0,021%     | 0,020%     | 0,026%     | 0,023%     | 0,022%     | 0,020%     |
| <b>NL</b>        | 0,953%                 | 0,934%     | 0,803%     | 0,882%     | 0,856%     | 0,906%     | 0,984%     | 0,810%     | 0,814%     | 0,803%     |
| <b>PL</b>        | 0,647%                 | 0,634%     | 0,494%     | 0,764%     | 0,641%     | 0,693%     | 0,680%     | 0,674%     | 0,646%     | 0,761%     |
| <b>PT</b>        | 0,250%                 | 0,272%     | 0,278%     | 0,300%     | 0,235%     | 0,238%     | 0,245%     | 0,258%     | 0,251%     | 0,318%     |
| <b>RO</b>        | 0,230%                 | 0,270%     | 0,220%     | 0,274%     | 0,292%     | 0,302%     | 0,302%     | 0,284%     | 0,274%     | 0,388%     |
| <b>SE</b>        | 0,559%                 | 0,356%     | 0,241%     | 0,330%     | 0,312%     | 0,336%     | 0,346%     | 0,318%     | 0,291%     | 0,351%     |
| <b>SI</b>        | 0,062%                 | 0,051%     | 0,045%     | 0,053%     | 0,053%     | 0,056%     | 0,059%     | 0,057%     | 0,052%     | 0,051%     |
| <b>SK</b>        | 0,127%                 | 0,123%     | 0,103%     | 0,123%     | 0,121%     | 0,128%     | 0,137%     | 0,124%     | 0,118%     | 0,119%     |
| <b>GB</b>        | 2,866%                 | 1,784%     | 1,617%     | 2,185%     | 1,982%     | 2,093%     | 2,177%     | 1,976%     | 1,775%     | 1,881%     |
| <b>US</b>        | 21,600%                | 18,211%    | 18,060%    | 20,918%    | 13,140%    | 13,516%    | 14,172%    | 17,971%    | 13,311%    | 16,958%    |
| <b>JP</b>        | 5,385%                 | 2,676%     | 2,819%     | 3,833%     | 3,513%     | 3,800%     | 3,663%     | 3,824%     | 2,907%     | 2,805%     |
| <b>CN</b>        | 22,139%                | 14,953%    | 17,678%    | 19,555%    | 27,875%    | 23,955%    | 18,178%    | 20,218%    | 24,395%    | 21,137%    |
| <b>CA</b>        | 1,828%                 | 2,080%     | 0,999%     | 1,597%     | 1,047%     | 1,027%     | 1,087%     | 1,316%     | 1,015%     | 1,420%     |
| <b>KR</b>        | 2,297%                 | 1,667%     | 1,768%     | 2,086%     | 1,932%     | 1,923%     | 1,968%     | 1,847%     | 1,712%     | 1,801%     |
| <b>BR</b>        | 1,810%                 | 5,931%     | 1,858%     | 3,299%     | 4,256%     | 3,589%     | 6,358%     | 3,464%     | 3,236%     | 4,705%     |

| Countries | Economic Output | LUC    | WCB     | GHG    | FAE    | MAE    | TEX    | PHO    | PMR     | DEU    |
|-----------|-----------------|--------|---------|--------|--------|--------|--------|--------|---------|--------|
| IN        | 3,638%          | 4,627% | 18,373% | 6,176% | 4,945% | 7,887% | 4,967% | 8,616% | 11,280% | 7,890% |
| MX        | 1,132%          | 1,189% | 1,249%  | 1,287% | 1,516% | 1,423% | 2,236% | 1,326% | 1,187%  | 1,179% |
| RU        | 1,624%          | 2,944% | 0,838%  | 2,207% | 2,567% | 3,492% | 3,110% | 1,704% | 1,637%  | 1,319% |
| AU        | 1,456%          | 1,948% | 0,962%  | 1,293% | 0,707% | 0,842% | 0,751% | 0,990% | 0,832%  | 1,921% |
| CH        | 0,802%          | 0,478% | 0,425%  | 0,482% | 0,464% | 0,478% | 0,565% | 0,531% | 0,465%  | 0,464% |
| TR        | 0,844%          | 1,103% | 1,276%  | 1,320% | 1,651% | 1,643% | 1,311% | 1,054% | 1,180%  | 1,536% |
| TW        | 0,729%          | 0,749% | 0,678%  | 0,807% | 0,772% | 0,801% | 0,856% | 0,731% | 0,681%  | 0,715% |
| NO        | 0,383%          | 0,184% | 0,126%  | 0,189% | 0,223% | 0,233% | 0,260% | 0,191% | 0,178%  | 0,171% |
| ID        | 1,166%          | 1,187% | 1,124%  | 1,188% | 0,903% | 0,872% | 0,837% | 1,737% | 1,487%  | 1,568% |
| ZA        | 0,386%          | 0,870% | 0,558%  | 1,077% | 1,046% | 0,907% | 1,156% | 0,943% | 1,186%  | 0,899% |
| WA        | 4,735%          | 5,647% | 6,886%  | 5,206% | 5,636% | 5,476% | 6,375% | 5,210% | 5,941%  | 5,753% |
| WL        | 2,567%          | 5,423% | 2,226%  | 3,088% | 3,673% | 3,301% | 5,308% | 3,184% | 3,155%  | 4,356% |
| WE        | 0,498%          | 0,862% | 0,550%  | 0,921% | 1,269% | 1,694% | 1,841% | 1,015% | 1,057%  | 0,828% |
| WF        | 1,960%          | 8,689% | 2,832%  | 3,086% | 2,799% | 2,032% | 2,833% | 4,561% | 4,902%  | 3,557% |
| WM        | 3,475%          | 2,148% | 4,451%  | 3,165% | 2,915% | 2,968% | 3,572% | 2,717% | 2,623%  | 2,533% |

**Table. 4. Percentage of Pull Force Weights (PFW) for each environmental pressure and Economic Output per world region in 2022.**

| Countries | Economic Output | LUC    | WCB    | GHG    | FAEr   | MAE    | TEX    | PHO_   | PMR    | DEU    |
|-----------|-----------------|--------|--------|--------|--------|--------|--------|--------|--------|--------|
| AT        | 0,477%          | 0,182% | 0,138% | 0,234% | 0,173% | 0,179% | 0,188% | 0,214% | 0,176% | 0,240% |
| BE        | 0,593%          | 0,369% | 0,380% | 0,446% | 0,380% | 0,401% | 0,446% | 0,410% | 0,366% | 0,408% |
| BG        | 0,078%          | 0,143% | 0,095% | 0,143% | 0,123% | 0,149% | 0,119% | 0,114% | 0,133% | 0,196% |
| CY        | 0,022%          | 0,013% | 0,025% | 0,036% | 0,125% | 0,154% | 0,139% | 0,022% | 0,036% | 0,021% |
| CZ        | 0,327%          | 0,235% | 0,175% | 0,318% | 0,236% | 0,254% | 0,276% | 0,283% | 0,268% | 0,267% |
| DE        | 4,016%          | 1,644% | 1,320% | 2,374% | 2,359% | 2,687% | 2,585% | 2,196% | 1,767% | 2,131% |
| DK        | 0,366%          | 0,196% | 0,161% | 0,222% | 0,306% | 0,342% | 0,392% | 0,273% | 0,250% | 0,224% |
| EE        | 0,036%          | 0,035% | 0,016% | 0,163% | 0,037% | 0,063% | 0,029% | 0,108% | 0,051% | 0,029% |
| ES        | 1,467%          | 1,242% | 1,615% | 1,182% | 0,965% | 0,828% | 0,834% | 1,309% | 0,956% | 1,191% |
| FI        | 0,293%          | 0,247% | 0,081% | 0,220% | 0,148% | 0,187% | 0,171% | 0,179% | 0,134% | 0,196% |
| FR        | 2,810%          | 1,863% | 1,359% | 1,848% | 1,536% | 1,503% | 1,646% | 1,832% | 1,667% | 1,913% |
| GR        | 0,196%          | 0,388% | 0,524% | 0,647% | 2,158% | 2,744% | 2,377% | 0,722% | 0,816% | 0,400% |
| HR        | 0,061%          | 0,049% | 0,041% | 0,055% | 0,047% | 0,049% | 0,060% | 0,062% | 0,054% | 0,056% |
| HU        | 0,193%          | 0,163% | 0,122% | 0,189% | 0,154% | 0,164% | 0,169% | 0,196% | 0,170% | 0,193% |
| IE        | 0,522%          | 0,262% | 0,222% | 0,303% | 0,321% | 0,261% | 0,362% | 0,553% | 0,296% | 0,295% |
| IT        | 2,168%          | 2,078% | 1,771% | 2,234% | 2,085% | 2,143% | 2,289% | 2,209% | 2,019% | 2,038% |
| LT        | 0,052%          | 0,048% | 0,026% | 0,050% | 0,034% | 0,037% | 0,043% | 0,048% | 0,042% | 0,049% |
| LU        | 0,117%          | 0,065% | 0,061% | 0,060% | 0,062% | 0,063% | 0,070% | 0,057% | 0,059% | 0,055% |

| <b>Countries</b> | <b>Economic Output</b> | <b>LUC</b> | <b>WCB</b> | <b>GHG</b> | <b>FAEr</b> | <b>MAE</b> | <b>TEX</b> | <b>PHO_</b> | <b>PMR</b> | <b>DEU</b> |
|------------------|------------------------|------------|------------|------------|-------------|------------|------------|-------------|------------|------------|
| <b>LV</b>        | 0,037%                 | 0,088%     | 0,028%     | 0,048%     | 0,043%      | 0,043%     | 0,048%     | 0,054%      | 0,054%     | 0,057%     |
| <b>MT</b>        | 0,018%                 | 0,030%     | 0,016%     | 0,016%     | 0,017%      | 0,016%     | 0,024%     | 0,021%      | 0,020%     | 0,017%     |
| <b>NL</b>        | 0,953%                 | 0,666%     | 0,570%     | 0,711%     | 0,636%      | 0,685%     | 0,763%     | 0,577%      | 0,578%     | 0,568%     |
| <b>PL</b>        | 0,647%                 | 0,576%     | 0,398%     | 0,869%     | 0,555%      | 0,601%     | 0,563%     | 0,687%      | 0,645%     | 0,887%     |
| <b>PT</b>        | 0,250%                 | 0,231%     | 0,277%     | 0,315%     | 0,191%      | 0,194%     | 0,188%     | 0,224%      | 0,220%     | 0,342%     |
| <b>RO</b>        | 0,230%                 | 0,321%     | 0,228%     | 0,320%     | 0,329%      | 0,321%     | 0,318%     | 0,340%      | 0,318%     | 0,566%     |
| <b>SE</b>        | 0,559%                 | 0,233%     | 0,113%     | 0,197%     | 0,175%      | 0,195%     | 0,197%     | 0,182%      | 0,157%     | 0,240%     |
| <b>SI</b>        | 0,062%                 | 0,033%     | 0,027%     | 0,038%     | 0,034%      | 0,035%     | 0,039%     | 0,045%      | 0,037%     | 0,037%     |
| <b>SK</b>        | 0,127%                 | 0,123%     | 0,094%     | 0,127%     | 0,115%      | 0,115%     | 0,144%     | 0,135%      | 0,119%     | 0,123%     |
| <b>GB</b>        | 2,866%                 | 1,088%     | 0,954%     | 1,671%     | 1,395%      | 1,514%     | 1,576%     | 1,381%      | 1,147%     | 1,269%     |
| <b>US</b>        | 21,600%                | 15,441%    | 15,944%    | 19,415%    | 9,370%      | 9,971%     | 9,798%     | 15,623%     | 9,861%     | 14,149%    |
| <b>JP</b>        | 5,385%                 | 1,718%     | 1,745%     | 3,222%     | 2,700%      | 3,124%     | 2,926%     | 3,224%      | 1,990%     | 1,860%     |
| <b>CN</b>        | 22,139%                | 14,869%    | 18,328%    | 21,738%    | 33,018%     | 27,683%    | 19,281%    | 22,435%     | 27,858%    | 23,640%    |
| <b>CA</b>        | 1,828%                 | 2,475%     | 0,625%     | 1,527%     | 0,802%      | 0,766%     | 0,799%     | 1,136%      | 0,770%     | 1,341%     |
| <b>KR</b>        | 2,297%                 | 1,269%     | 1,315%     | 2,002%     | 1,577%      | 1,599%     | 1,685%     | 1,575%      | 1,273%     | 1,475%     |
| <b>BR</b>        | 1,810%                 | 7,126%     | 1,621%     | 3,511%     | 4,680%      | 3,844%     | 7,563%     | 3,705%      | 3,360%     | 5,318%     |
| <b>IN</b>        | 3,638%                 | 5,483%     | 25,739%    | 7,857%     | 5,891%      | 10,330%    | 5,925%     | 11,381%     | 15,129%    | 10,322%    |
| <b>MX</b>        | 1,132%                 | 1,781%     | 1,947%     | 1,910%     | 2,688%      | 2,481%     | 4,415%     | 2,112%      | 1,908%     | 1,732%     |
| <b>RU</b>        | 1,624%                 | 2,821%     | 0,367%     | 1,841%     | 2,177%      | 3,281%     | 2,816%     | 1,238%      | 1,133%     | 0,815%     |
| <b>AU</b>        | 1,456%                 | 1,883%     | 0,538%     | 0,990%     | 0,330%      | 0,458%     | 0,368%     | 0,626%      | 0,434%     | 1,728%     |
| <b>CH</b>        | 0,802%                 | 0,224%     | 0,193%     | 0,243%     | 0,229%      | 0,234%     | 0,328%     | 0,316%      | 0,243%     | 0,232%     |
| <b>TR</b>        | 0,844%                 | 1,189%     | 1,519%     | 1,608%     | 2,130%      | 2,083%     | 1,486%     | 1,116%      | 1,325%     | 1,983%     |
| <b>TW</b>        | 0,729%                 | 0,664%     | 0,541%     | 0,891%     | 0,827%      | 0,877%     | 0,914%     | 0,716%      | 0,601%     | 0,660%     |
| <b>NO</b>        | 0,383%                 | 0,094%     | 0,044%     | 0,100%     | 0,148%      | 0,155%     | 0,186%     | 0,105%      | 0,095%     | 0,083%     |
| <b>ID</b>        | 1,166%                 | 1,356%     | 1,106%     | 1,317%     | 0,855%      | 0,811%     | 0,753%     | 2,093%      | 1,672%     | 1,843%     |
| <b>ZA</b>        | 0,386%                 | 0,928%     | 0,477%     | 1,299%     | 1,241%      | 1,038%     | 1,426%     | 1,049%      | 1,370%     | 1,006%     |
| <b>WA</b>        | 4,735%                 | 6,399%     | 7,725%     | 4,963%     | 5,462%      | 5,132%     | 7,391%     | 4,814%      | 5,887%     | 5,844%     |
| <b>WL</b>        | 2,567%                 | 6,784%     | 1,833%     | 3,071%     | 3,955%      | 3,430%     | 6,436%     | 3,217%      | 3,205%     | 4,975%     |
| <b>WE</b>        | 0,498%                 | 1,189%     | 0,636%     | 1,302%     | 1,962%      | 2,793%     | 3,133%     | 1,503%      | 1,582%     | 1,130%     |
| <b>WF</b>        | 1,960%                 | 12,510%    | 3,066%     | 3,597%     | 3,106%      | 1,918%     | 3,192%     | 5,775%      | 6,197%     | 4,254%     |
| <b>WM</b>        | 3,475%                 | 1,184%     | 3,854%     | 2,559%     | 2,109%      | 2,067%     | 3,124%     | 1,806%      | 1,552%     | 1,600%     |

**Table. 5. Percentage of Driving Force Weights (DFW) for each environmental pressure and Economic Output per world region in 2022.**

**Direct and indirect Pulling Force Weights and Driving Force Weights for all regions and each environmental pressure.**

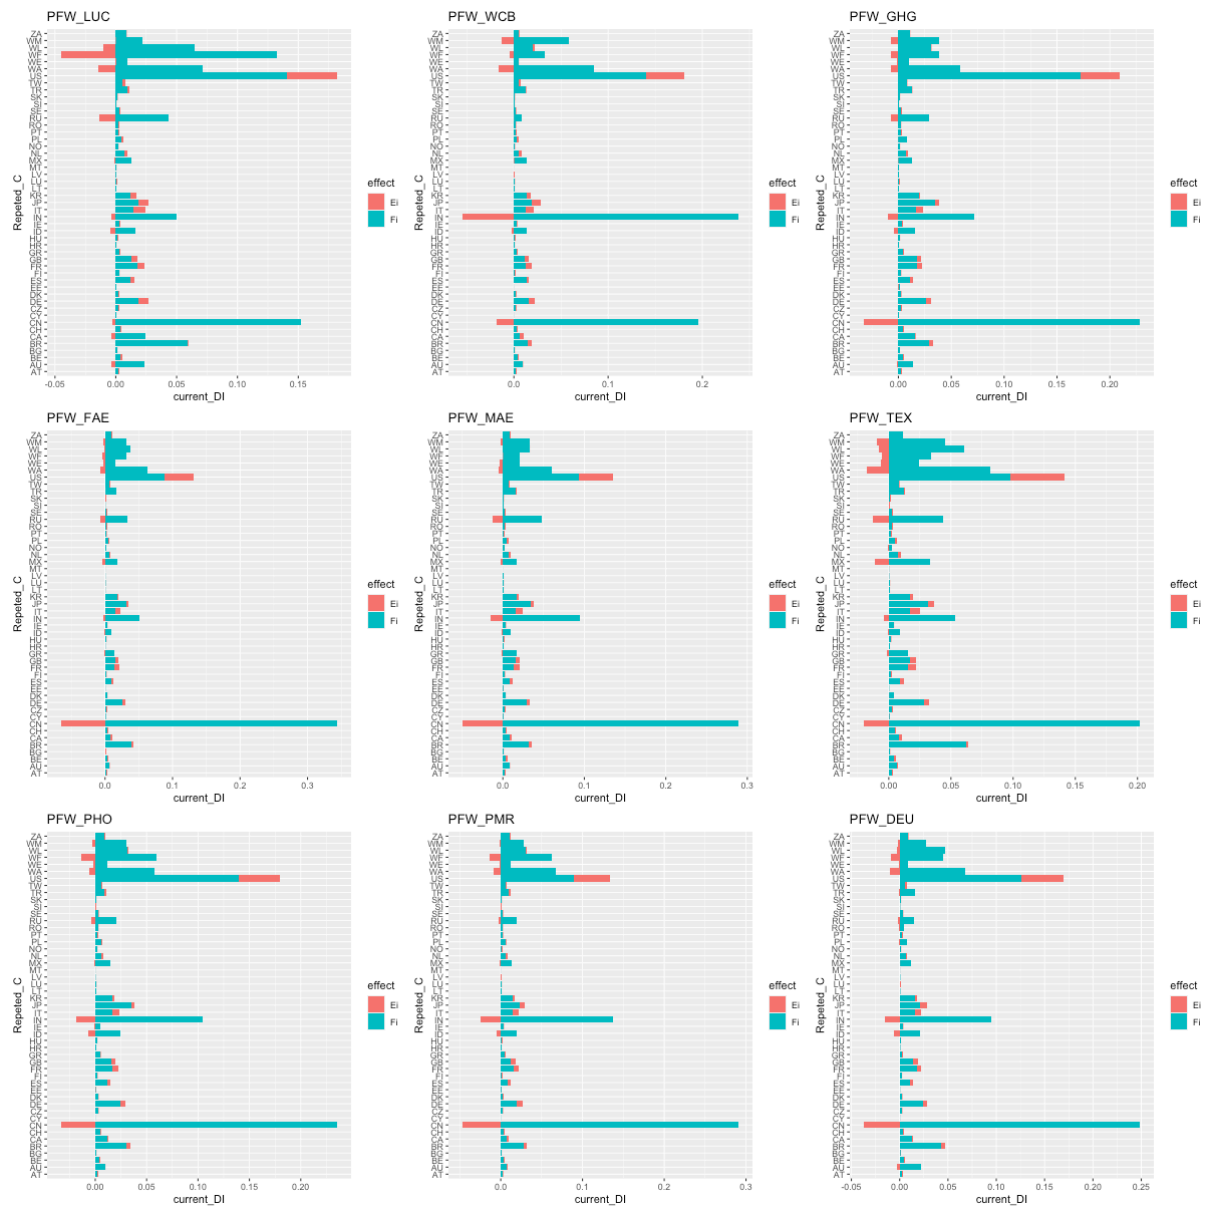

**Fig. 5. Direct and indirect Pulling Force Weights for all regions and each environmental pressure.** Fi represents the direct pulling force weight and Ei represents the indirect pulling force weight. DEU = Domestic Extraction Used; GHG = Greenhouse gasses emissions; MAE = Marine Aquatic Ecotoxicity; PMR = Particulate Matter/Respiratory; WCB = Water Consumption Blue; FAE = Freshwater Aquatic Ecotoxicity; LUC = Land Use Change; PHO = Photochemical Oxidation; TEX = Terrestrial Ecotoxicity.

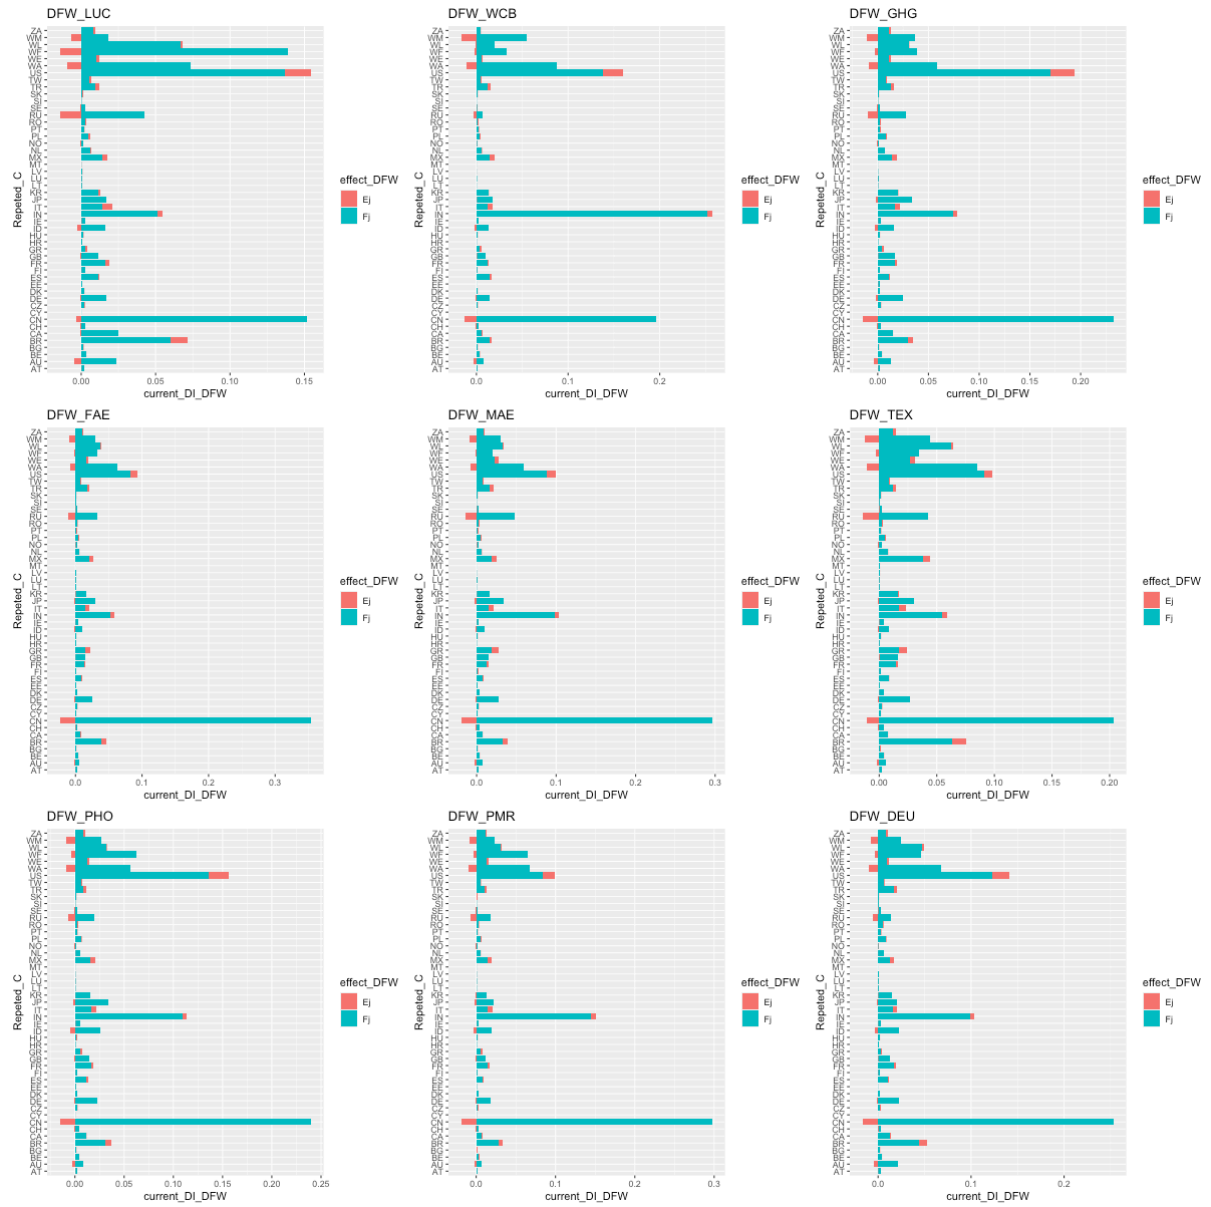

**Fig. 6. Direct and indirect Driving Force Weights for all regions and each environmental pressure.** Fi represents the direct driving force weight and Ei represents the indirect driving force weight. DEU = Domestic Extraction Used; GHG = Greenhouse gasses emissions; MAE = Marine Aquatic Ecotoxicity; PMR = Particulate Matter/Respiratory; WCB = Water Consumption Blue; FAE = Freshwater Aquatic Ecotoxicity; LUC = Land Use Change; PHO = Photochemical Oxidation; TEX = Terrestrial Ecotoxicity.
